# Supplementary material for: Fusion Protein of RBP and Albumin Domain III Reduces Lung Fibrosis by Inactivating Lung Stellate Cells
Source: MDPI journal article supplement (doi:10.3390/biomedicines11072007), 2023-07-16
Supplement: s1 [file s1]

## Supplementary Materials

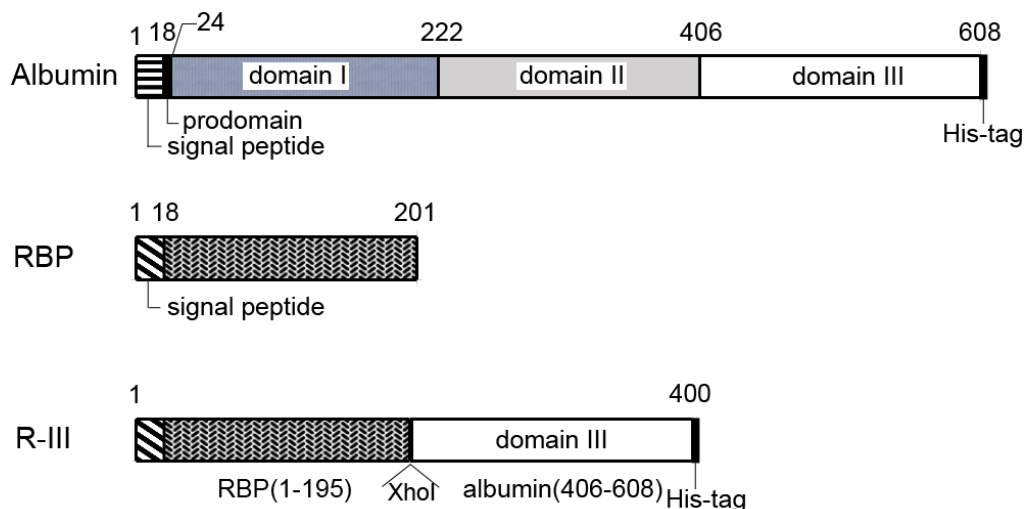

**Figure S1.** Schematic diagram of the retinol-binding protein (RBP)–albumin domain III fusion protein, in comparison with full-length albumin and RBP. Note that the fusion protein is histidine tagged at the C-terminal end. The numbers indicate amino acids.

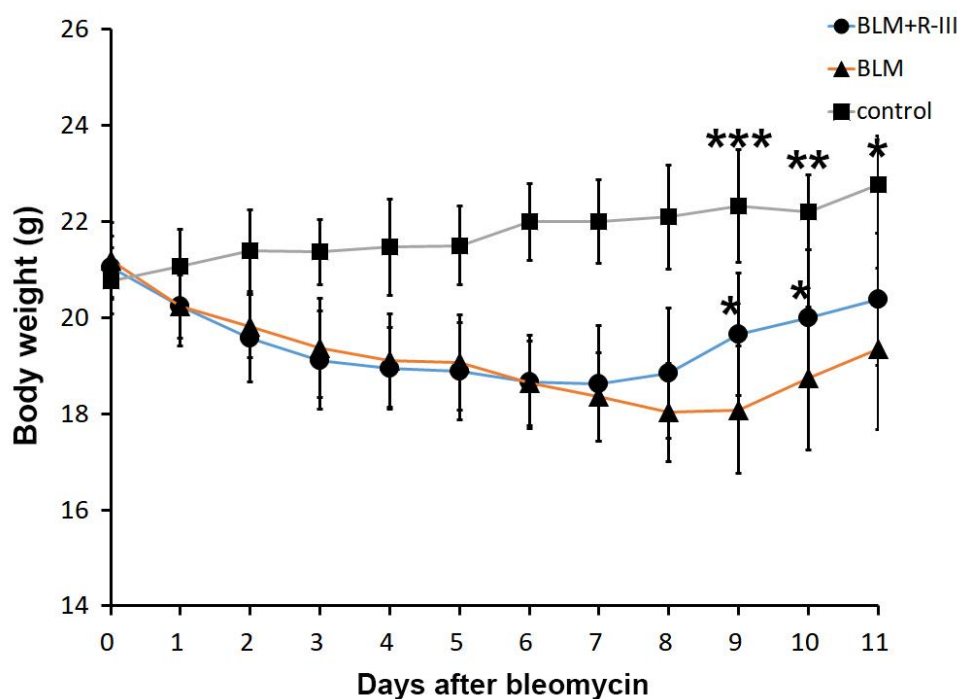

**Figure S2.** Body weight of control, bleomycin (BLM)-, BLM+R-III-treated mice. The body weight of the mice was monitored over a period of 11 days after bleomycin instillation and expressed as means  $\pm$  SD. \*  $p < 0.05$ , \*\*  $p < 0.01$ , and \*\*\*  $p < 0.001$  by a Welch's t-test (compared with BLM-treated mice).

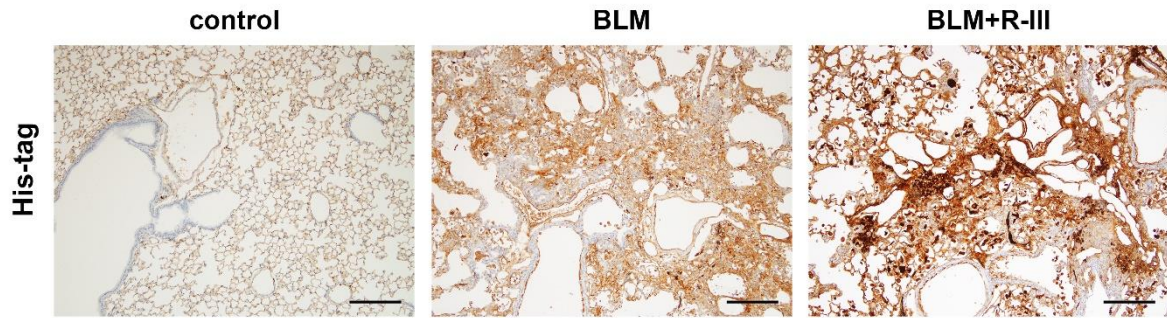

**Figure S3.** Cellular distribution of injected His-tagged R-III. Lung sections from control, BLM-treated, and BLM+R-III-treated mice were subjected to immunohistochemical staining for the His-tag. The His-positive signals were observed to be localized in the fibrotic foci. Scale bar, 200  $\mu$ m.
